# Supplementary material for: Effective Anomaly Detection Using Deep Learning in IoT Systems
Source: Hindawi journal article supplement (doi:10.1155/2021/9054336), 2021-01-01
Supplement: f1 [file 9054336.f1.docx]

Supplementary Material:

http://bit.ly/3iomrwR
